# Supplementary material for: Spred2 Deficiency Exacerbates D-Galactosamine/Lipopolysaccharide -induced Acute Liver Injury in Mice via Increased Production of TNFα
Source: PubMed Central journal article supplement (PMC5760641; doi:10.1038/s41598-017-18380-0), 2018-01-09
Supplement: 41598_2017_18380_MOESM1_ESM.pdf [file 41598_2017_18380_MOESM1_ESM.pdf]

# Spred2 Deficiency Exacerbates D-Galactosamine/Lipopolysaccharide-induced Acute Liver Injury in Mice via Increased Production of TNF $\alpha$

Xu Yang, Masayoshi Fujisawa, Teizo Yoshimura, Toshiaki Ohara, Miwa Sato, Megumi Mino, Thar Htet San, Tong Gao, Steven L. Kunkel and Akihiro Matsukawa

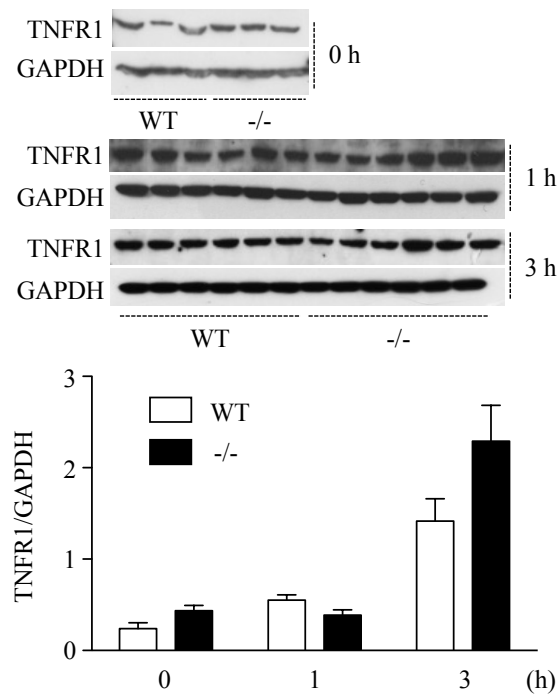

## Supplemental Figure 1

WT and Spred-2<sup>-/-</sup> mice were intraperitoneally injected with D-galactosamine (400 mg/kg) and LPS (20  $\mu$ g/kg). At appropriate time intervals, mice were sacrificed and the livers were resected. Livers were extracted and expressions of TNF receptor 1 (TNFR1) in liver extracts were analysed by western blotting. There were no differences between WT- and Spred-2<sup>-/-</sup>-livers (time 0: 3 each, time 1 and 3 h: 6 mice each).

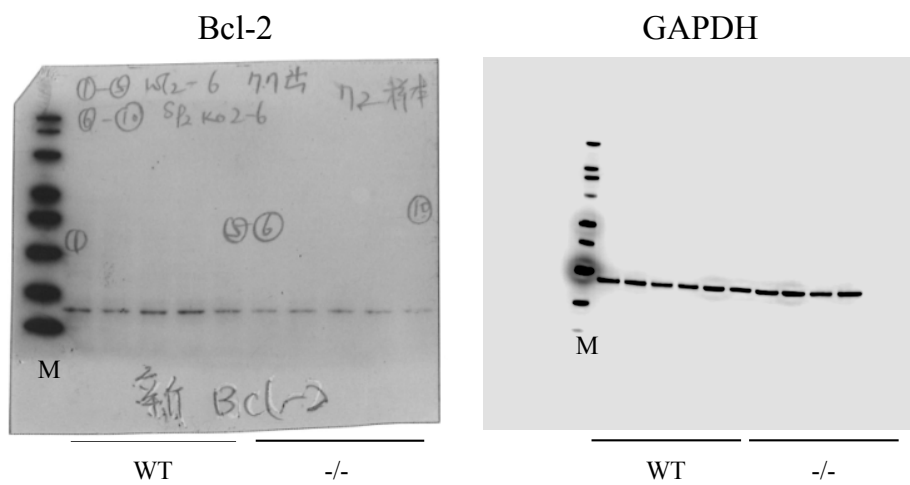

**Supplemental Figure 2**

Liver extracts at 5 h after injection of D-GalN/LPS were immunoblotted using the indicated primary antibodies. Uncropped images of the Figure 2d are shown. Left; Bcl-2, Right; GAPDH. M; Marker. Shown are 5 each from WT and Spred2<sup>-/-</sup>-livers.

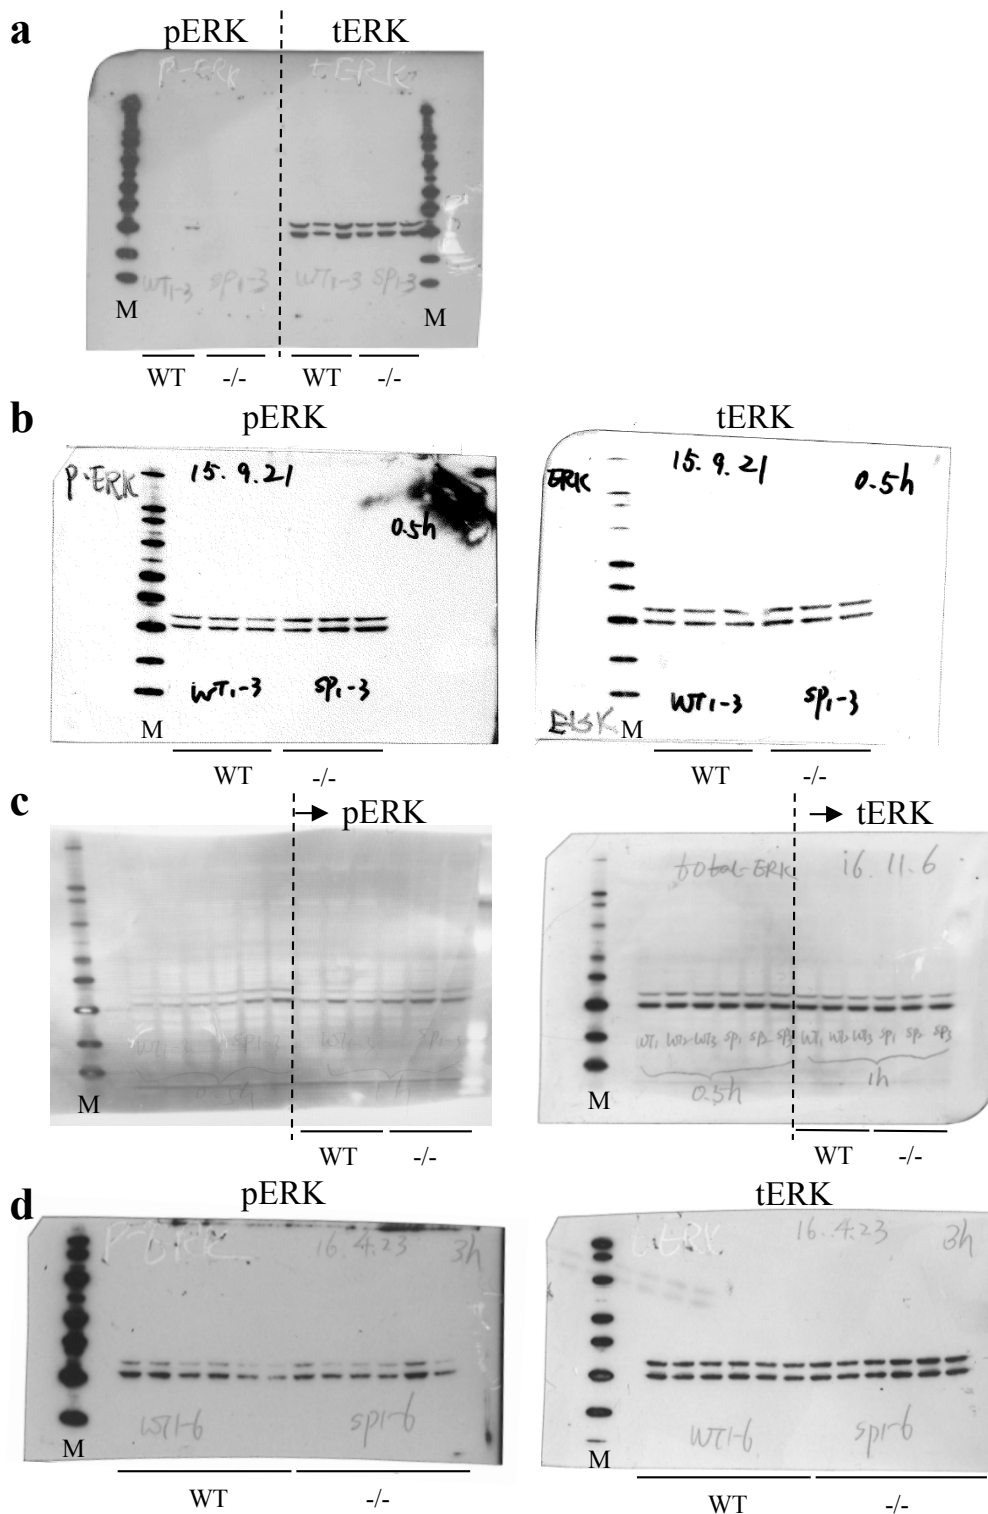

### Supplemental Figure 3

Liver extracts at 0 h (a), 0.5 h (b), 1 h (c), and 3 h (d) after injection of D-GalN/LPS were immunoblotted using the indicated primary antibodies. Uncropped images of the Figure 3a are shown. M; Marker. Shown are 3 each (a-c) and 6 each (d) from WT and *Spred2*<sup>-/-</sup>-livers.

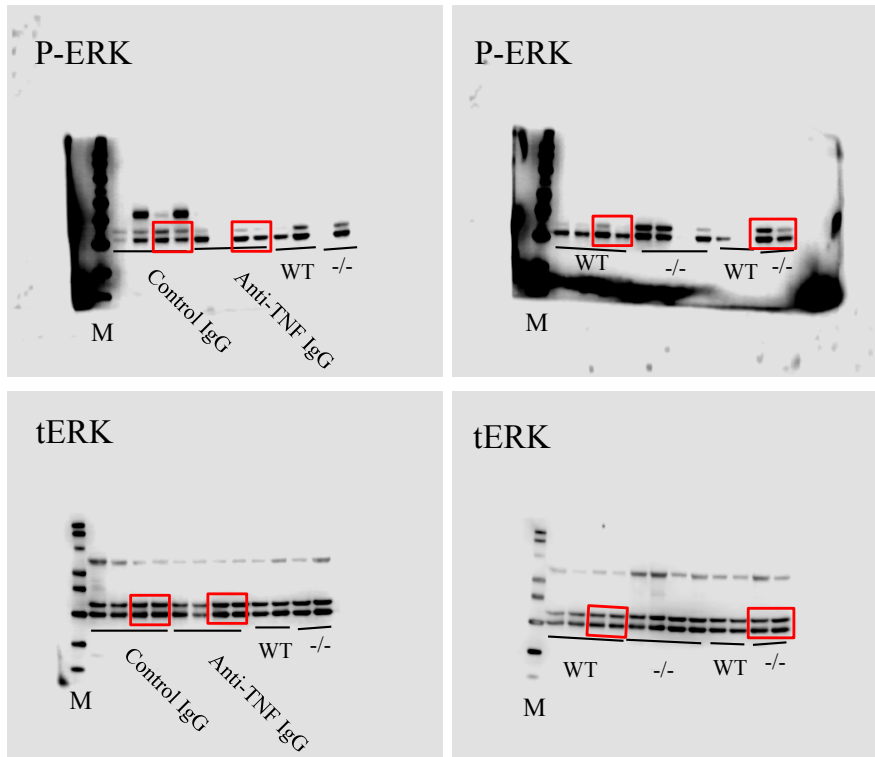

#### Supplemental Figure 4

Experiment 1: Neutralizing anti-murine TNF $\alpha$  IgG or control IgG (each 750  $\mu$ g/mouse) was i.p. administered into Spred2<sup>-/-</sup> mice 14 h before D-GalN/LPS administration. At 5 h after D-GalN/LPS challenge, the mice were sacrificed. Liver extracts at 5 h after injection of D-GalN/LPS were immunoblotted using the indicated primary antibodies. Uncropped images (shown red square) of the Figure 4d are shown. M; Marker. Shown are 4 each from Spred2<sup>-/-</sup>-livers.

Experiment 2: WT and Spred2<sup>-/-</sup> mice were injected with D-GalN (700 mg/kg, i.p.)/TNF $\alpha$  (10  $\mu$ g/kg, i.v.), and sacrificed at 6 h after challenge. Liver extracts were immunoblotted using the indicated primary antibodies. Uncropped images (shown red square) of the Figure 5e are shown. M; Marker. Shown are 8 each from WT and Spred2<sup>-/-</sup>-livers.

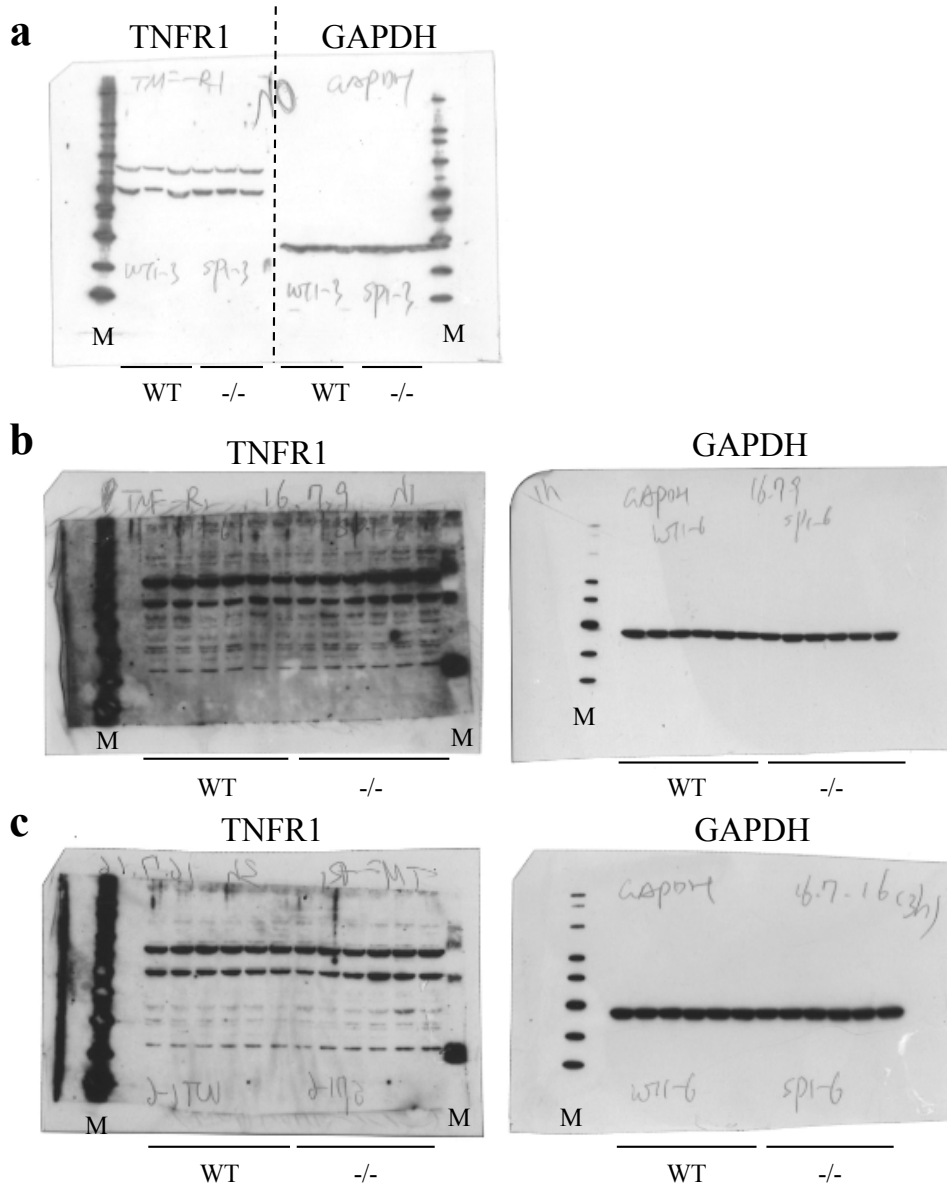

**Supplemental Figure 5**

Liver extracts at 0 h (a), 1 h (b), and 3 h (c) after injection of D-GalN/LPS were immunoblotted using the indicated primary antibodies. Uncropped images of the Supplemental Figure 1 are shown. M; Marker. Shown are 3 each from WT and *Spre2*<sup>-/-</sup>-livers at 0 h (a), and 6 each at 1 (b) and 3 h (c).
